# Supplementary material for: Exploring the feasibility of home-delivered capsule endoscopy with 5G support: innovations and carbon footprint insights
Source: PubMed Central journal article supplement — BMJ Open Gastroenterol. 2024 Oct 31;11(1):e001500. doi: 10.1136/bmjgast-2024-001500 (PMC11529455; doi:10.1136/bmjgast-2024-001500), 2024-10-31
Supplement: bmjgast-11-1-s001.pdf [file bmjgast-11-1-s001.pdf]

Supplementary table 1 Inclusion/exclusion criteria

| Inclusion criteria                                                                                                                                                                                                                                                                                                                                                                                                    | Exclusion criteria                                                                                                                                                                                    |
|-----------------------------------------------------------------------------------------------------------------------------------------------------------------------------------------------------------------------------------------------------------------------------------------------------------------------------------------------------------------------------------------------------------------------|-------------------------------------------------------------------------------------------------------------------------------------------------------------------------------------------------------|
| <ul style="list-style-type: none"><li>• Patients who have been selected by overseeing clinician meeting NHS England criteria to undergo colon capsule endoscopy as part of their standard of care</li><li>• Post polypectomy surveillance</li><li>• Age between 18-65</li><li>• Have good hand and finger movements.</li><li>• Requirement to understand English appropriately.</li><li>• To be IT literate</li></ul> | <ul style="list-style-type: none"><li>• Patients unable or unwilling to provide consent to take part in the study.</li><li>• Patient is pregnant.</li><li>• Standard CCE exclusion criteria</li></ul> |
